# Supplementary material for: The Role of Heavy Metals in Plant Response to Biotic Stress
Source: PubMed Central journal article supplement (PMC6225295; doi:10.3390/molecules23092320), 2018-09-11
Supplement: molecules-23-02320-s001.pdf [file molecules-23-02320-s001.pdf]

**Table S1. Effects of heavy metals on hormetic and toxic doses on physiological and biochemical factors in plants**

| Metal | Plant species                     | Plant organ      | Hormetic/toxic effect | Concentration                                   | Increase of parameter                                                                                                                                                                                                                                                                                                                                                                                     | Decrease of parameter                                                                                                                                                                                                                                                                                                                                         | Authors |
|-------|-----------------------------------|------------------|-----------------------|-------------------------------------------------|-----------------------------------------------------------------------------------------------------------------------------------------------------------------------------------------------------------------------------------------------------------------------------------------------------------------------------------------------------------------------------------------------------------|---------------------------------------------------------------------------------------------------------------------------------------------------------------------------------------------------------------------------------------------------------------------------------------------------------------------------------------------------------------|---------|
| Al    | <i>Oryza sativa</i> L.            | shoot, root      | hormetic effect       | 200 $\mu$ M AlCl <sub>3</sub>                   | Chlorophyll a and b, total chlorophyll, free amino acids – Cotaxtla, Huimanguilo, Temporalero cultivars; soluble sugars, P, K – in roots; N - Cotaxtla cultivar in roots; Ca – Huimanguilo cultivar in roots; Mg - Cotaxtla, Tres Rios, Huimanguilo cultivars in roots; N, Mg - in shoots; K - in Cotaxtla, Tres Rios, Huimanguilo cultivar in shoots; Ca - in Tres Rios, Temporalero cultivars in shoots | Chlorophyll a and b, total chlorophyll, free amino acids - Tres Rios cultivar, proline; N - in Cotaxtla, Tres Rios, Huimanguilo cultivars in roots; Ca - in Cotaxtla, Tres Rios, Temporalero cultivar in roots; Mg - in Temporalero cultivar in roots; P - in shoots; K - in Temporalero cultivar in shoots; Ca - in Cotaxtla, Huimanguilo cultivar in shoots | [44]    |
| Al    | <i>Camellia sinensis</i> L.       | root             | hormetic effect       | 400 $\mu$ M AlCl <sub>3</sub>                   | superoxide dismutase (SOD), catalase (CAT), ascorbate peroxidase (APX)                                                                                                                                                                                                                                                                                                                                    | Lipid peroxidation, wall-bound phenols, lignin, phenylalanine ammonia lyase (PAL), soluble fraction of proline oxidase (POX), ionically wall bound peroxidases, covalently wall bound peroxidases                                                                                                                                                             | [53]    |
| Al    | <i>Melastoma malabathricum</i> L. | root, stem, leaf | hormetic effect       | 0.5 mM AlCl <sub>3</sub>                        | N, P - in young, mature and old leaves; K - in mature and old leaves                                                                                                                                                                                                                                                                                                                                      | K - in young leaves; N, K – in roots                                                                                                                                                                                                                                                                                                                          | [54]    |
| Al    | <i>Glycine max</i> (L.) Merr.     | root             | hormesis effect       | 25 $\mu$ M AlCl <sub>3</sub> ·6H <sub>2</sub> O | SOD, peroxidase (POD), malondialdehyde (MDA) content                                                                                                                                                                                                                                                                                                                                                      | -                                                                                                                                                                                                                                                                                                                                                             | [55]    |
|       |                                   |                  | toxic effect          | 50 $\mu$ M AlCl <sub>3</sub> ·6H <sub>2</sub> O | SOD, POD, MDA content                                                                                                                                                                                                                                                                                                                                                                                     | -                                                                                                                                                                                                                                                                                                                                                             |         |

|    |                                 |          |                 |                                                       |                                                                                                                                                                                                                                           |                                                                                                                                                                                                                                        |       |
|----|---------------------------------|----------|-----------------|-------------------------------------------------------|-------------------------------------------------------------------------------------------------------------------------------------------------------------------------------------------------------------------------------------------|----------------------------------------------------------------------------------------------------------------------------------------------------------------------------------------------------------------------------------------|-------|
| Al | <i>Zea mays</i> L.              | leaf     | hormesis effect | 48 $\mu$ M<br>AlCl <sub>3</sub> ·7H <sub>2</sub> O    | MDA content, superoxide radicals (SOR) production, protein, chlorophylls                                                                                                                                                                  | SOD, POD, CAT, K, Ca, Mg, photosynthetic rate                                                                                                                                                                                          | [56]  |
| As | <i>Spirodela polyrrhiza</i> L.  | seedling | hormesis effect | 1, 5, 10 $\mu$ M<br>Na <sub>2</sub> HAsO <sub>4</sub> | Total protein content - 1 and 4 days after exposure; chlorophyll a, b and t, carotenoids - 1 and 4 days after exposure; non protein thiols, cystein content, ascorbic acid content - 1 and 4 days after exposure                          | Total protein content - 7 days after exposure; chlorophyll a, b and t, carotenoids - 7 days after exposure; non protein thiols, cystein content, ascorbic acid content - 7 days after exposure                                         | [65]  |
|    |                                 |          | toxic effect    | 20 $\mu$ M<br>Na <sub>2</sub> HAsO <sub>4</sub>       | Total protein content - 1day after exposure;<br>chlorophylls a, b and t - 1 day after exposure;<br>carotenoids - 1 and 4 days after exposure;<br>non protein thiols, cystein content, ascorbic acid content - 1 and 4 days after exposure | Total protein content - 4 and 7 days after exposure; chlorophylls a, b and t - 4 and 7 days after exposure; carotenoids - 7 days after exposure;<br>non protein thiols, cystein content, ascorbic acid content - 7 days after exposure |       |
| As | <i>Pteris vittata</i> L.        | fern     | hormesis effect | 100 ppm<br>chromated<br>copper arsenate<br>(CCA)      | -                                                                                                                                                                                                                                         | -                                                                                                                                                                                                                                      | [254] |
| Cd | <i>Gypsophila fastigiata</i> L. | shoot    | hormesis effect | 0.5, 2.5, 5 $\mu$ M<br>CdCl <sub>2</sub>              | total phenols phenylpropanoids, flavonols anthocyanins                                                                                                                                                                                    | Chlorophylls a and b, carotenoids                                                                                                                                                                                                      | [60]  |

|    |                                                                       |                              |                    |                                                                      |                                                                                                                                                                                                                                                                                                              |                                                                                                                                                                                                                                                                                         |      |
|----|-----------------------------------------------------------------------|------------------------------|--------------------|----------------------------------------------------------------------|--------------------------------------------------------------------------------------------------------------------------------------------------------------------------------------------------------------------------------------------------------------------------------------------------------------|-----------------------------------------------------------------------------------------------------------------------------------------------------------------------------------------------------------------------------------------------------------------------------------------|------|
|    |                                                                       |                              |                    |                                                                      | K, Ca, Mg, P, Zn- in leaves<br>Cu – in leaves for 25 $\mu\text{mol}\cdot\text{L}^{-1}$<br>CdCl <sub>2</sub>                                                                                                                                                                                                  | S, Fe, Mn – in leaves<br>Cu and B – in leaves for 50 and<br>100 $\mu\text{mol}\cdot\text{L}^{-1}$ CdCl <sub>2</sub>                                                                                                                                                                     |      |
|    |                                                                       |                              | hormesis<br>effect | 25, 50, 100<br>$\mu\text{mol}\cdot\text{L}^{-1}$ CdCl <sub>2</sub>   | P, Cu, B – in stems<br>K, Mg, S – in stems for 50 and 100<br>$\mu\text{mol}\cdot\text{L}^{-1}$ CdCl <sub>2</sub><br>Fe – in stems for 25 and 100 $\mu\text{mol}\cdot\text{L}^{-1}$<br>CdCl <sub>2</sub><br>Zn – in stems for 25 and 50 $\mu\text{mol}\cdot\text{L}^{-1}$<br>CdCl <sub>2</sub>                | K, Ca, Mg, S – in stems for 25<br>$\mu\text{mol}\cdot\text{L}^{-1}$ CdCl <sub>2</sub><br>Fe – in stems for 50 $\mu\text{mol}\cdot\text{L}^{-1}$<br>CdCl <sub>2</sub><br>Zn – in stems for 100 $\mu\text{mol}\cdot\text{L}^{-1}$<br>CdCl <sub>2</sub><br>Mn – in stems                   |      |
| Cd | <i>Sedum alfredii</i><br>Hance                                        | shoot                        |                    |                                                                      | K, Ca, Mg, P, Fe- in leaves for 200<br>and 400 $\mu\text{mol}\cdot\text{L}^{-1}$ CdCl <sub>2</sub><br>S – in leaves only for 200 $\mu\text{mol}\cdot\text{L}^{-1}$<br>CdCl <sub>2</sub>                                                                                                                      | K, Mg, P, Fe – in leaves only for<br>800 $\mu\text{mol}\cdot\text{L}^{-1}$ CdCl <sub>2</sub><br>Mn, Cu, B – leaves<br>S – in leaves only for 400 and 800<br>$\mu\text{mol}\cdot\text{L}^{-1}$ CdCl <sub>2</sub>                                                                         | [57] |
|    |                                                                       |                              | toxic effect       | 200, 400, 800<br>$\mu\text{mol}\cdot\text{L}^{-1}$ CdCl <sub>2</sub> | Zn, Fe – in stems<br>K, P, S, Cu – in stems only for 200<br>and 400 $\mu\text{mol}\cdot\text{L}^{-1}$ CdCl <sub>2</sub> ;<br>B – in stems only for 400 and 800<br>$\mu\text{mol}\cdot\text{L}^{-1}$ CdCl <sub>2</sub> ;<br>Mn - in stems only for 400<br>$\mu\text{mol}\cdot\text{L}^{-1}$ CdCl <sub>2</sub> | Ca, Mg – in stems;<br>Mn - stems only for 200 and 400<br>$\mu\text{mol}\cdot\text{L}^{-1}$ CdCl <sub>2</sub><br>P, S – in stems only for 800<br>$\mu\text{mol}\cdot\text{L}^{-1}$ CdCl <sub>2</sub><br>B – in stems only for 200 $\mu\text{mol}\cdot\text{L}^{-1}$<br>CdCl <sub>2</sub> |      |
| Cd | <i>Viola</i><br><i>baoshanensis</i><br>W.S.Shu,<br>W.Liu &<br>C.Y.Lan | plant<br>(no<br>distinction) | hormesis<br>effect | 5, 10, 20, 30<br>mg·L <sup>-1</sup> CdCl <sub>2</sub>                |                                                                                                                                                                                                                                                                                                              |                                                                                                                                                                                                                                                                                         | [58] |
|    |                                                                       |                              | toxic effect       | 40, 50, 60 mg·L <sup>-1</sup><br>CdCl <sub>2</sub>                   |                                                                                                                                                                                                                                                                                                              |                                                                                                                                                                                                                                                                                         |      |

|    |                                  |                  |                 |                                                                   |                                                                                                                                                                                                                                                                                                                                                                                |                                                                                                                                                                                                                                                                                                                                                                                   |      |
|----|----------------------------------|------------------|-----------------|-------------------------------------------------------------------|--------------------------------------------------------------------------------------------------------------------------------------------------------------------------------------------------------------------------------------------------------------------------------------------------------------------------------------------------------------------------------|-----------------------------------------------------------------------------------------------------------------------------------------------------------------------------------------------------------------------------------------------------------------------------------------------------------------------------------------------------------------------------------|------|
| Cd | <i>Lonicera japonica</i> Thunb.  | root, stem, leaf | hormetic effect | 5, 10 mg kg <sup>-1</sup> CdCl <sub>2</sub> ·2.5 H <sub>2</sub> O | Net photosynthesis rate, stomatal conductance; transpiration rate - only for 5 mg kg <sup>-1</sup> CdCl <sub>2</sub> ·2.5H <sub>2</sub> O, photochemical efficiency of Photosystem II (PSII), effective quantum yield of PSII, phytochemical quenching coefficient, potential efficiency of PSII phytochemistry, chlorophyll a, chlorophyll b, carotenoids, total chlorophylls | Intercellular CO <sub>2</sub> concentration; transpiration rate - only for 10 mg kg <sup>-1</sup> CdCl <sub>2</sub> ·2.5H <sub>2</sub> O                                                                                                                                                                                                                                          | [59] |
|    |                                  |                  | toxic effect    | 25, 50, 100 CdCl <sub>2</sub> ·2.5 H <sub>2</sub> O               | Phytochemical quenching coefficient - only for 25 CdCl <sub>2</sub> ·2.5H <sub>2</sub> O; carotenoid - only for 50, 100 CdCl <sub>2</sub> ·2.5H <sub>2</sub> O                                                                                                                                                                                                                 | Net photosynthesis rate, stomatal conductance, intercellular CO <sub>2</sub> concentration, photochemical, transpiration rate, efficiency of PSII, effective quantum yield of PSII, phytochemical quenching coefficient, potential efficiency of PSII phytochemistry; chlorophylls a and b, carotenoids - only for 100 CdCl <sub>2</sub> ·2.5H <sub>2</sub> O; total chlorophylls |      |
| Cd | <i>Dianthus carhusianorum</i> L. | shoot, root      | hormetic effect | 1, 3, 5.5 μM CdCl <sub>2</sub>                                    | K, Fe; Zn, chlorophyll a and b, carotenoids - only for 3 and 5.5 μM CdCl <sub>2</sub>                                                                                                                                                                                                                                                                                          | Na, Mg, Ca, Mn, Cu, total phenols, phenylpropanoids; Zn, chlorophyll a and b, carotenoids, flavonols, anthocyanins - only for 3 and 5.5 μM CdCl <sub>2</sub>                                                                                                                                                                                                                      | [60] |
| Cd | <i>Solanum melongena</i> L.      | shoot, root      | hormetic effect | 10 <sup>-8</sup> M CdCl <sub>2</sub>                              | -                                                                                                                                                                                                                                                                                                                                                                              | protochlorophylls, chlorophylls a and b, total chlorophylls                                                                                                                                                                                                                                                                                                                       | [61] |

|    |                             |                |                 |                                                                                         |                                                                                                                                                                                                                                                            |                                                                                                                                                                                                               |      |
|----|-----------------------------|----------------|-----------------|-----------------------------------------------------------------------------------------|------------------------------------------------------------------------------------------------------------------------------------------------------------------------------------------------------------------------------------------------------------|---------------------------------------------------------------------------------------------------------------------------------------------------------------------------------------------------------------|------|
|    |                             |                | toxic effect    | 10 <sup>-2</sup> , 10 <sup>-4</sup> , 10 <sup>-5</sup> M CdCl <sub>2</sub>              | -                                                                                                                                                                                                                                                          | protochlorophylls, chlorophylls a and b, total chlorophylls (strong decrease)                                                                                                                                 |      |
| Cd | <i>Arabis paniculata</i> F. | seedling       | hormetic effect | 22, 44, 89 μM CdCl <sub>2</sub>                                                         | Chlorophylls a/b;<br>MDA – in leaves for 44 μM CdCl <sub>2</sub><br>superoxide anion, SOD, CAT,<br>glutathione peroxidase (GPX),<br>ascorbate peroxidase (APX) – in<br>leaves<br>glutathione reductase (GR)– in<br>leaves only for 89 μM CdCl <sub>2</sub> | chlorophylls a and b, carotenoids,<br>total chlorophylls- in leaves<br>MDA – in leaves only for 22 and<br>89 μM CdCl <sub>2</sub><br>hydrogen peroxide;<br>GR – in leaves only for 89 μM<br>CdCl <sub>2</sub> | [62] |
|    |                             |                |                 |                                                                                         | CAT – in root only for 22, 44 μM CdCl <sub>2</sub>                                                                                                                                                                                                         | MDA, hydrogen peroxide,<br>superoxide anion, SOD, GPX,<br>APX, GR - in root;<br>CAT - in root only for 89 μM<br>CdCl <sub>2</sub>                                                                             |      |
|    |                             |                | toxic effect    | 178 μM CdCl <sub>2</sub>                                                                | MDA, hydrogen peroxide, SOD,<br>CAT, GPX, APX, GR – in leaves<br>GR – in roots                                                                                                                                                                             | superoxide anion – in leaves<br>MDA, hydrogen peroxide,<br>superoxide anion, SOD, CAT,<br>GPX, APX – in roots                                                                                                 |      |
| Cd | <i>Brassica juncea</i> L.   | root,<br>shoot | hormetic effect | 10, 20, 40, 80, 160 mM CdCl <sub>2</sub> · H <sub>2</sub> O<br>- 14 days after exposure | Chlorophylls a, b and t,<br>carotenoids non protein thiols,<br>gluthation, total protein content<br>phytochelatin content, GR activity<br>(strong increase)                                                                                                | -                                                                                                                                                                                                             | [63] |
|    |                             |                | toxic effect    | 10, 20, 40, 80, 160 mM CdCl <sub>2</sub> · H <sub>2</sub> O<br>- 28 days after exposure | Chlorophylls a, b and t,<br>carotenoids, non -protein thiols,<br>gluthation, total protein content<br>phytochelatin content, GR activity                                                                                                                   | -                                                                                                                                                                                                             |      |

|    |                                   |                    |                 |                                                                  |                                                                                                                                                                                                                                                                             |                                                                                                                                                                                                                                                                                  |      |
|----|-----------------------------------|--------------------|-----------------|------------------------------------------------------------------|-----------------------------------------------------------------------------------------------------------------------------------------------------------------------------------------------------------------------------------------------------------------------------|----------------------------------------------------------------------------------------------------------------------------------------------------------------------------------------------------------------------------------------------------------------------------------|------|
| Cd | <i>Salsola kali</i> L.            | root               | hormetic effect | 20 mg L <sup>-1</sup> of Cd(II)                                  | Ca, Mn, Mo                                                                                                                                                                                                                                                                  | K, P, Mg, Fe, Cu, Zn                                                                                                                                                                                                                                                             | [64] |
|    |                                   |                    | toxic effect    | 5, 10 mg L <sup>-1</sup> of Cd(II)                               | K, P, Ca, Cu                                                                                                                                                                                                                                                                | Mg, Fe, Zn, Mn, Mo                                                                                                                                                                                                                                                               |      |
| Cd | <i>Spirodela polyrrhiza</i> L.    | seedling           | hormesis effect | 0.1, 0.5, 1 µM CdCl <sub>2</sub> ·H <sub>2</sub> O               | Total protein content - 1 day after exposure; chlorophylls a, b and t - 1 day after exposure and for 0.1,0.5 µM Cd <sup>2+</sup> 4 day after exposure; carotenoids, non-protein thiols, cysteine content - 1 and 4 days after exposure; ascorbic acid -1 day after exposure | Total protein content - 4 and 7 days after exposure; chlorophylls a, b and t - 7 days after exposure and for 1 µM Cd <sup>2+</sup> 4 days after exposure; carotenoids, non-protein thiols, cysteine content - 7 days after exposure; ascorbic acid – 4 and 7 days after exposure | [65] |
|    |                                   |                    | toxic effect    | 2 µM CdCl <sub>2</sub> ·H <sub>2</sub> O                         | Total protein content, chlorophylls a, b and t, ascorbic acid - 1 day after exposure; carotenoids, non protein-thiols , cystein content - 1 and 4 days after exposure                                                                                                       | Total protein content, chlorophylls a, b and t, ascorbic acid - 4 and 7 days after exposure; carotenoids, non-proteic thiols, cystein content - 7 days after exposure                                                                                                            |      |
| Cd | <i>Arabis paniculata</i> Franch   | root, shoot        | hormetic effect | 9, 44, 89, 178 µM Cd CdCl <sub>2</sub> ·2.5H <sub>2</sub> O      | chlorophylls a and b, chlorophylls a+b                                                                                                                                                                                                                                      | -                                                                                                                                                                                                                                                                                | [66] |
|    |                                   |                    | toxic effect    | 267 µM Cd CdCl <sub>2</sub> ·2.5H <sub>2</sub> O                 | chlorophyll a, chlorophylls a+b                                                                                                                                                                                                                                             | chlorophyll b                                                                                                                                                                                                                                                                    |      |
| Cr | <i>Eichhornia crassipes</i> Mart. | root, aerial parts | hormetic effect | 2.0, 4.0 mg·L <sup>-1</sup> CrCl <sub>3</sub> ·6H <sub>2</sub> O | chlorophylls a and b, carotenoids; CAT, POD, SOD, GR activity, MDA - in roots and aerial parts                                                                                                                                                                              | CAT activity - in aerial parts 72 h after exposure                                                                                                                                                                                                                               | [67] |
|    |                                   |                    | toxic effect    | 6.0, 8.0 mg·L <sup>-1</sup> CrCl <sub>3</sub> ·6H <sub>2</sub> O | chlorophylls a and b, carotenoids, CAT, POD, SOD, GR acivity, MDA - in roots and aerial parts                                                                                                                                                                               | CAT activity – only in aerial parts 72 h after exposure                                                                                                                                                                                                                          |      |

|    |                        |                |                    |                                                                                          |                                                                                                                                                                                       |                                                                                                                                                                                   |      |                                                                            |                   |                                            |      |
|----|------------------------|----------------|--------------------|------------------------------------------------------------------------------------------|---------------------------------------------------------------------------------------------------------------------------------------------------------------------------------------|-----------------------------------------------------------------------------------------------------------------------------------------------------------------------------------|------|----------------------------------------------------------------------------|-------------------|--------------------------------------------|------|
| Cr | <i>Salsola kali</i> L. | root,<br>shoot | hormetic<br>effect | 5, 10<br>mg·L <sup>-1</sup> K <sub>2</sub> Cr <sub>2</sub> O <sub>7</sub> –<br>in roots  | Ca and Mg, Cu Zn - for 5<br>mg·L <sup>-1</sup> Cr(VI)                                                                                                                                 | K, P, Fe and Mg, Cu, Zn - for 10<br>mg·L <sup>-1</sup> Cr(VI)                                                                                                                     | [68] |                                                                            |                   |                                            |      |
|    |                        |                |                    | 5, 10 Cr(NO <sub>3</sub> ) <sub>3</sub> –<br>in roots                                    | Ca- for 10 Cr(NO <sub>3</sub> ) <sub>3</sub> ; Fe - for 5<br>Cr(NO <sub>3</sub> ) <sub>3</sub>                                                                                        | K, P, Mg, Cu, Zn;<br>Ca, Fe - for 5 Cr(NO <sub>3</sub> ) <sub>3</sub>                                                                                                             |      |                                                                            |                   |                                            |      |
|    |                        |                |                    | 5, 10 mg·L <sup>-1</sup><br>K <sub>2</sub> Cr <sub>2</sub> O <sub>7</sub> – in<br>shoots | K, Fe – in stem for 10 mg·L <sup>-1</sup><br>K <sub>2</sub> Cr <sub>2</sub> O <sub>7</sub><br>-                                                                                       | Ca, P, Mg, Cu, Zn and K, Fe – in<br>stem for 5 10 mg·L <sup>-1</sup> K <sub>2</sub> Cr <sub>2</sub> O <sub>7</sub><br>Ca, K, P, Mg, Fe, Cu, Zn – in<br>leaves                     |      |                                                                            |                   |                                            |      |
|    |                        |                |                    | 5 mg·L <sup>-1</sup><br>Cr(NO <sub>3</sub> ) <sub>3</sub> – in<br>shoots                 | K;<br>Fe - in stem only for 10 mg·L <sup>-1</sup><br>Cr(NO <sub>3</sub> ) <sub>3</sub><br>Zn;<br>K, P – in leaves only for 10 mg·L <sup>-1</sup><br>Cr(NO <sub>3</sub> ) <sub>3</sub> | Ca, P, Mg, Cu, Zn; Fe – in stem<br>only for 5 mg·L <sup>-1</sup> Cr(NO <sub>3</sub> ) <sub>3</sub><br>Ca, Mg, Fe, Cu;<br>K, P – in leaves for 5 Cr(NO <sub>3</sub> ) <sub>3</sub> |      |                                                                            |                   |                                            |      |
|    |                        |                |                    | 20 mg·L <sup>-1</sup><br>K <sub>2</sub> Cr <sub>2</sub> O <sub>7</sub> – in<br>roots     | Ca                                                                                                                                                                                    | K, P, Mg, Fe, Cu, Zn                                                                                                                                                              |      |                                                                            |                   |                                            |      |
|    |                        |                |                    | 20 mg·L <sup>-1</sup><br>Cr(NO <sub>3</sub> ) <sub>3</sub> – in<br>roots                 | Ca                                                                                                                                                                                    | K, P, Mg, Fe, Cu, Zn                                                                                                                                                              |      |                                                                            |                   |                                            |      |
|    |                        |                |                    | 20 mg·L <sup>-1</sup><br>K <sub>2</sub> Cr <sub>2</sub> O <sub>7</sub> – in<br>shoot     | K - in stem<br>Zn – in leaves                                                                                                                                                         | Ca, P, Mg, Fe, Cu, Zn – in stem<br>Ca, K, P, Mg, Fe, Cu – in leaves                                                                                                               |      |                                                                            |                   |                                            |      |
|    |                        |                |                    | 10, 20 mg·L <sup>-1</sup><br>Cr(NO <sub>3</sub> ) <sub>3</sub> – in<br>shoots            | Fe – in stem<br>K – in leaves                                                                                                                                                         | Ca, K, P, Mg, Cu, Zn – in stem<br>Ca, P, Mg, Fe, Cu, Zn – in leaves                                                                                                               |      |                                                                            |                   |                                            |      |
|    |                        |                |                    | Cr                                                                                       | <i>Lemna minuta</i><br>Kunth                                                                                                                                                          | hormesis<br>effect                                                                                                                                                                |      | 2.5, 5 mg·L <sup>-1</sup><br>Cr <sub>2</sub> O <sub>4</sub> K <sub>2</sub> | No<br>differences | chlorophylls, carotene and malondialdehyde | [69] |

|    |                                        |                 |                    |                                                                            |                                                                                                                            |                                                                                               |      |
|----|----------------------------------------|-----------------|--------------------|----------------------------------------------------------------------------|----------------------------------------------------------------------------------------------------------------------------|-----------------------------------------------------------------------------------------------|------|
|    |                                        |                 | toxic effect       | 10, 20 mg·L <sup>-1</sup><br>Cr <sub>2</sub> O <sub>4</sub> K <sub>2</sub> |                                                                                                                            |                                                                                               |      |
| Cr | <i>Allium cepa</i> L.                  | root            | hormesis effect    | 12.5 μM CrO <sub>3</sub>                                                   | CAT, GPX, SOD, APX activity<br>deoxyribonucleic acid (DNA)<br>damage                                                       | superoxide radical, hydrogen<br>peroxide, hydroxyl radical, cell<br>death, lipid peroxidation | [70] |
|    |                                        |                 | toxic effect       | 25, 50, 100, 200<br>μM CrO <sub>3</sub>                                    | superoxide radical, hydrogen<br>peroxide, hydroxyl radical, cell<br>death, lipid peroxidation, GPX<br>activity, DNA damage | CAT, SOD, APX activity                                                                        |      |
| La | <i>Capsicum<br/>annuum</i> L.          | shoot,<br>leaf  | hormetic<br>effect | 10 μM LaCl <sub>3</sub>                                                    | total soluble sugars<br>total soluble proteins<br>chlorophylls a and b, total<br>chlorophylls                              | total soluble amino acids                                                                     | [71] |
| La | <i>Lonicera<br/>japonica</i><br>Thunb. | leaf            | hormetic<br>effect | 10, 20, 30 mg·L <sup>-1</sup><br>(La III)                                  | POD activity, chlorophyll content,<br>chlorophylls a/b value                                                               | relative electrolyte leakage, MDA,<br>H <sub>2</sub> O <sub>2</sub> content                   | [72] |
|    |                                        |                 | toxic effect       | 60, 100 mg·L <sup>-1</sup><br>(La III)                                     | relative electrolyte leakage, MDA,<br>H <sub>2</sub> O <sub>2</sub> content                                                | POD activity, chlorophyll content,<br>chlorophylls a/b value                                  |      |
| La | <i>Oryza sativa</i> L.                 | root            | hormetic<br>effect | 0.05, 0.1<br>mmol·L <sup>-1</sup><br>La(NO <sub>3</sub> ) <sub>3</sub>     | K, Mg, Ca, Na, Mn, Mo                                                                                                      | Fe, Zn, Cu                                                                                    | [73] |
|    |                                        |                 | toxic effect       | 0.5, 1, 1.5<br>mmol·L <sup>-1</sup><br>La(NO <sub>3</sub> ) <sub>3</sub>   | Mg, Na, Fe, Mn                                                                                                             | K, Ca, Zn, Cu, Mo                                                                             |      |
| Pb | <i>Arabis<br/>paniculata</i><br>Franch | roots,<br>shoot | hormesis<br>effect | 24, 48 μM<br>Pb(NO <sub>3</sub> ) <sub>2</sub>                             | chlorophyll a;<br>chlorophylls a+b - for 24 μM<br>Pb(NO <sub>3</sub> ) <sub>2</sub>                                        | chlorophyll b;<br>chlorophylls a+b - for 48 μM<br>Pb(NO <sub>3</sub> ) <sub>2</sub>           | [66] |



|    |                                          |                |                    |                                                                                       |                                                                                                                         |                                                                                                                     |      |
|----|------------------------------------------|----------------|--------------------|---------------------------------------------------------------------------------------|-------------------------------------------------------------------------------------------------------------------------|---------------------------------------------------------------------------------------------------------------------|------|
|    |                                          |                | toxic effect       | 97, 193, 386 $\mu\text{M}$<br>$\text{Pb}(\text{NO}_3)_2$                              | chlorophyll a, chlorophylls a+b -<br>for 97 $\mu\text{M}$ $\text{Pb}(\text{NO}_3)_2$                                    | Chlorophyll b;<br>Chlorophyll a and chlorophylls<br>a+b - for 193, 386 $\mu\text{M}$ $\text{Pb}(\text{NO}_3)_2$     |      |
| Pb | <i>Pisum sativum</i><br>L.               | shoot          | hormesis<br>effect | 0.075 mM<br>$\text{Pb}(\text{NO}_3)_2$                                                | TSA, SA, SAG, ABA, pisatin, 2'OH<br>genistein, Glc-Glc-Glc rhamnose,<br>PAL                                             | Glc-Glc-Glc kaempferol, $\beta$ -<br>glucosidase                                                                    | [35] |
|    |                                          |                | toxic effect       | 0.5 mM<br>$\text{Pb}(\text{NO}_3)_2$                                                  | TSA, SA, SAG, ABA, pisatin, 2'OH<br>genistein, Glc-Glc-Glc rhamnose,<br>PAL                                             | Glc-Glc-Glc kaempferol, $\beta$ -<br>glucosydase                                                                    |      |
| Pb | <i>Brassica<br/>pekinensis</i><br>Rupr.  | root,<br>shoot | hormesis<br>effect | 125, 250, 500,<br>1000 $\mu\text{g}\cdot\text{mL}^{-1}$<br>$\text{Pb}(\text{NO}_3)_2$ | -                                                                                                                       | -                                                                                                                   | [74] |
| Pb | <i>Dianthus<br/>carthusianorum</i><br>L. | shoot          | hormesis<br>effect | 0.1, 0.5, 1 mM<br>$\text{Pb}(\text{NO}_3)_2$                                          | Zn, Fe;<br>Cu - for 0.1, 0.5 mM $\text{Pb}(\text{NO}_3)_2$<br>Mg, K - for 1 mM $\text{Pb}(\text{NO}_3)_2$               | Na, Ca, Mn;<br>Mg, K – only for. 1 mM $\text{Pb}(\text{NO}_3)_2$ ;<br>Cu – only for 1 mM $\text{Pb}(\text{NO}_3)_2$ | [60] |
| Pb | <i>Anthyllis<br/>vulneraria</i> L.       | shoot          | hormesis<br>effect | 0.5, 1 mM<br>$\text{Pb}(\text{NO}_3)_2$                                               | Phenols, anthocyanins, MDA,<br>POD, CAT, chlorophylls a and b,<br>carotenoids                                           | -                                                                                                                   | [75] |
|    |                                          |                | toxic effect       | 1.5 mM<br>$\text{Pb}(\text{NO}_3)_2$                                                  | Phenols, anthocyanins, MDA,<br>POD, chlorophylls a and b,<br>carotenoids                                                | CAT                                                                                                                 |      |
| Hg | <i>Helianthus<br/>tuberosus</i> L.       | stem           | hormesis<br>effect | 0.15, 1 mg $\text{kg}^{-1}$<br>$\text{HgCl}_2$                                        | MDA - for 1 mg $\text{kg}^{-1}$ $\text{HgCl}_2$ ;<br>Pn, chlorophylls - for 0.15 mg $\text{kg}^{-1}$<br>$\text{HgCl}_2$ | Pn, chlorophyll, Fv/Fm - for 1 mg<br>$\text{kg}^{-1}$ $\text{HgCl}_2$                                               | [76] |
|    |                                          |                | toxic effect       | 5, 10 mg $\text{kg}^{-1}$<br>$\text{HgCl}_2$                                          | MDA;<br>Pn - for 10 mg $\text{kg}^{-1}$ $\text{HgCl}_2$                                                                 | Pn - for 5 mg $\text{kg}^{-1}$ $\text{HgCl}_2$ ;<br>chlorophylls, Fv/Fm                                             |      |
| Pd | <i>Pisum sativum</i><br>L.               | root           | hormesis<br>effect | 0.10, 0.25, 1.0,<br>mg $\text{L}^{-1}$                                                | Photosynthetic efficiency                                                                                               | -                                                                                                                   | [77] |

| K <sub>2</sub> PdCl <sub>4</sub> |                                                     |               |                 |                                                                                                                                                                                                   |                                                                                                 |                                                                  |
|----------------------------------|-----------------------------------------------------|---------------|-----------------|---------------------------------------------------------------------------------------------------------------------------------------------------------------------------------------------------|-------------------------------------------------------------------------------------------------|------------------------------------------------------------------|
|                                  |                                                     |               | toxic effect    | 0.10, 0.25, 10, 25<br>mg L <sup>-1</sup> K <sub>2</sub> PdCl <sub>4</sub>                                                                                                                         | Photosynthetic efficiency                                                                       | -                                                                |
| Pt                               | <i>Arabidopsis thaliana</i> L.                      | root, rosette | hormetic effect | 2.5 μM<br>Pt(NH <sub>3</sub> ) <sub>4</sub> (NO <sub>3</sub> ) <sub>2</sub>                                                                                                                       | net photosynthesis<br>stomatal resistance<br>chlorophyll content<br>glutathione, phytochelatins | -                                                                |
|                                  |                                                     |               | toxic effect    | 5, 25, 50, 100<br>μM.<br>Pt(NH <sub>3</sub> ) <sub>4</sub> (NO <sub>3</sub> ) <sub>2</sub>                                                                                                        | glutathione, phytochelatins                                                                     | net photosynthesis<br>stomatal resistance<br>chlorophyll content |
| Ti                               | <i>Avena sativa</i> L.                              |               | toxic effect    | 2 ppm TiCl <sub>4</sub>                                                                                                                                                                           | -                                                                                               | -                                                                |
| U                                | <i>Schizachyrium scoparium</i> Michx.               | root, shoot   | hormesis effect | 50, 500 mg kg <sup>-1</sup><br>UO <sub>2</sub> (OH) <sub>2</sub> -nH <sub>2</sub> O                                                                                                               | -                                                                                               | -                                                                |
|                                  |                                                     |               | toxic effect    | 500, 25000 mg<br>kg <sup>-1</sup> UO <sub>2</sub> (OH) <sub>2</sub> -<br>nH <sub>2</sub> O                                                                                                        | -                                                                                               | -                                                                |
| Zn                               | <i>Thlaspi caerulescens</i><br>J.Presl &<br>C.Presl | shoot         | hormesis effect | 1000, 2000 μg·g <sup>-1</sup><br>ZnSO <sub>4</sub>                                                                                                                                                | Mg                                                                                              | K, Ca, P, Cl                                                     |
|                                  |                                                     |               | toxic effect    | 3000, 4000 μg·g <sup>-1</sup><br>ZnSO <sub>4</sub>                                                                                                                                                | -                                                                                               | Mg, K, Ca, P, Cl                                                 |
| Zn                               | <i>Sedum alfredii</i><br>Hance                      | root, shoot   | hormesis effect | 5, 10, 20, 40, 80,<br>160 mg·L <sup>-1</sup><br>ZnSO <sub>4</sub> ·7 H <sub>2</sub> O -<br>in shoots<br>20, 40, 80, 160<br>mg·L <sup>-1</sup> ZnSO <sub>4</sub> ·7<br>H <sub>2</sub> O - in roots | -                                                                                               | -                                                                |
|                                  |                                                     |               | toxic effect    | 240, 320 mg·L <sup>-1</sup><br>ZnSO <sub>4</sub> ·7 H <sub>2</sub> O                                                                                                                              | -                                                                                               | -                                                                |

[78]

[255]

[79]

[80]

[57]

|    |                                        |                |                    |                                                                                                                                                                                          |                                                                                                                         |                                                                                     |      |
|----|----------------------------------------|----------------|--------------------|------------------------------------------------------------------------------------------------------------------------------------------------------------------------------------------|-------------------------------------------------------------------------------------------------------------------------|-------------------------------------------------------------------------------------|------|
| Zn | <i>Arabis<br/>paniculata</i><br>Franch | root,<br>shoot | hormesis<br>effect | 306, 612, 1223;<br>2447 $\mu\text{M}$<br>$\text{ZnSO}_4 \cdot 7\text{H}_2\text{O}$ - in<br>shoots ;<br>153, 306 $\mu\text{M}$<br>$\text{ZnSO}_4 \cdot 7\text{H}_2\text{O}$ - in<br>roots | Chlorophylls a and b, chlorophylls<br>a+b                                                                               | -                                                                                   | [66] |
|    |                                        |                | toxic effect       | 1223, 2447 $\mu\text{M}$<br>$\text{ZnSO}_4 \cdot 7\text{H}_2\text{O}$ -<br>in roots                                                                                                      | Chlorophyll b, chlorophylls a+b;<br>Chlorophyll a - for 1223 $\mu\text{M}$<br>$\text{ZnSO}_4 \cdot 7\text{H}_2\text{O}$ | Chlorophyll a - for 2447 $\mu\text{M}$<br>$\text{ZnSO}_4 \cdot 7\text{H}_2\text{O}$ |      |
